# Supplementary material for: A Review of Clinical Outcomes, Owner Understanding and Satisfaction following Medial Canthoplasty in Brachycephalic Dogs in a UK Referral Setting (2016–2021)
Source: MDPI journal article supplement (doi:10.3390/ani13122032), 2023-06-19
Supplement: s1 [file s1]

## Supplementary

Table S1. Muroid discharge and conjunctival hyperaemia of dogs with brachycephaly recommended medial canthoplasty from 2016-2021 under referral veterinary care at the Queen Mother Hospital for Animals, Royal Veterinary College, UK.

|                         | Total study population (pre recommended MC*) |      |               |      | Atopic dermatitis |      |               |      | Non atopic dermatitis |      |               |      |
|-------------------------|----------------------------------------------|------|---------------|------|-------------------|------|---------------|------|-----------------------|------|---------------|------|
|                         | Ulcerated                                    |      | Non-ulcerated |      | Ulcerated         |      | Non-ulcerated |      | Ulcerated             |      | Non-ulcerated |      |
|                         | n/X                                          | %    | n/X           | %    | n/X               | %    | n/X           | %    | n/X                   | %    | n/X           | %    |
| Muroid ocular discharge | 12/25                                        | 48.0 | 29/246        | 11.8 | 1/4               | 25.0 | 12/38         | 31.6 | 2/21                  | 9.5  | 60/208        | 28.8 |
| Conjunctival hyperaemia | 8/25                                         | 32.0 | 21/246        | 8.5  | 1/4               | 25.0 | 15/38         | 39.5 | 3/21                  | 14.3 | 46/208        | 22.1 |

MC\* Medial canthoplasty
